# Supplementary material for: Feasibility of a subcutaneous gluteal turnover flap without donor site scar for perineal closure after abdominoperineal resection for rectal cancer
Source: PubMed Central journal article supplement (PMC6736901; doi:10.1007/s10151-019-02055-1), 2019-08-20
Supplement: 10151_2019_2055_MOESM1_ESM.pdf [file 10151_2019_2055_MOESM1_ESM.pdf]

**Article title:** Feasibility of a subcutaneous gluteal turnover flap without donor site scar for perineal closure after abdominoperineal resection for rectal cancer

**Journal name:** Techniques in Coloproctology

**Author names:** R.D. Blok, J.A.W. Hagemans, J.W.A. Burger, J. Rothbarth, J.D.W. van der Bilt, O. Lapid, R. Hompes, P.J. Tanis

**Corresponding author:** P.J. Tanis, M.D., Ph.D.; Department of Surgery, Amsterdam University Medical Centres, University of Amsterdam, Post box 22660, 1100 DD Amsterdam, the Netherlands; Phone: +31 20 566 9111; Fax: +31 20 566 6569; E-mail: P.J.Tanis@amc.nl.

**Supplementary table 1. Southampton wound scoring system**

| <b>Grade</b>                                                                                             | <b>Appearance</b>        |
|----------------------------------------------------------------------------------------------------------|--------------------------|
| <b>0</b>                                                                                                 | Normal healing           |
| <b>I Normal healing with mild bruising or erythema:</b>                                                  |                          |
| <i>A</i>                                                                                                 | Some bruising            |
| <i>B</i>                                                                                                 | Considerable bruising    |
| <i>C</i>                                                                                                 | Mild erythema            |
| <b>II Erythema plus other signs of inflammation:</b>                                                     |                          |
| <i>A</i>                                                                                                 | At one point             |
| <i>B</i>                                                                                                 | Around sutures           |
| <i>C</i>                                                                                                 | Along wound              |
| <i>D</i>                                                                                                 | Around wound             |
| <b>III Clear or haemoserous discharge:</b>                                                               |                          |
| <i>A</i>                                                                                                 | At one point only (<2cm) |
| <i>B</i>                                                                                                 | Along wound (>2cm)       |
| <i>C</i>                                                                                                 | Large volume             |
| <i>D</i>                                                                                                 | Prolonged (>3 days)      |
| <b>IV Pus:</b>                                                                                           |                          |
| <i>A</i>                                                                                                 | At one point only (<2cm) |
| <i>B</i>                                                                                                 | Along wound (>2cm)       |
| <b>V Deep or severe wound infection with or without tissue breakdown; haematoma requiring aspiration</b> |                          |
